# Supplementary material for: The Effect of Medical Cooperation in the CKD Patients: 10-Year Multicenter Cohort Study
Source: MDPI journal article supplement (doi:10.3390/jpm13040582), 2023-03-26
Supplement: s1 [file s1]

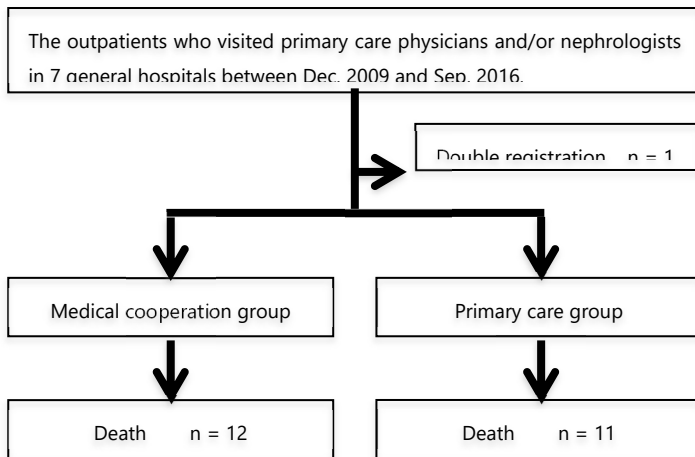

**Supplementary Figure S1. The flow diagram**

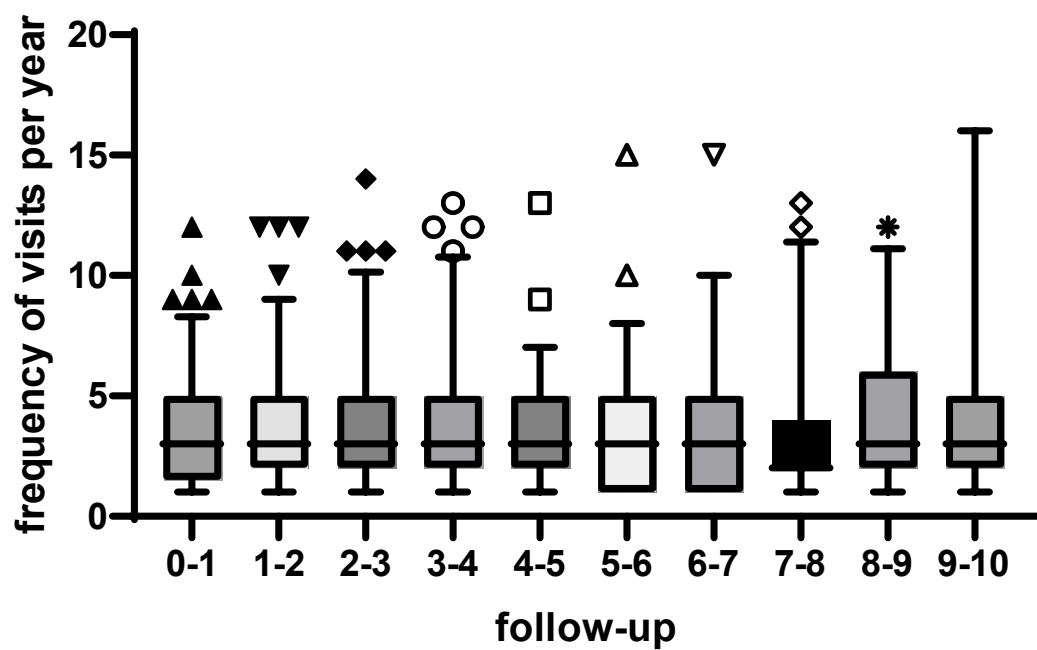

**Supplementary Figure S2. Frequency of nephrology visits for the patients in the medical cooperation group by survey year**
